# Supplementary material for: Enantioselective Michael addition of 1,3-dicarbonyl compounds to a nitroalkene catalyzed by chiral squaramides – a key step in the synthesis of pregabalin
Source: Royal Society of Chemistry journal article supplement (doi:10.1039/c3ob41709c), 2013-01-01
Supplement: c3ob41709c.pdf [file c3ob41709c.pdf]

## Supporting Information

### Enantioselective Michael addition of 1,3-dicarbonyl compounds to nitroalkene catalyzed by chiral squaramides – a key step in the synthesis of pregabalin

R. Baran, E. Veverková, A. Škvorcová and R. Šebesta\*

#### Contents

<sup>1</sup>H NMR and <sup>13</sup>C NMR of squaramideorganocatalysts and their precursors

<sup>1</sup>H NMR and <sup>13</sup>C NMR of Michael addition products **6a-6d**

<sup>1</sup>H NMR and <sup>13</sup>C NMR of pregabalin and its intermediates

HPLC chromatograms

DFT calculation of transition state model: Coordinates and energy of TS

#### <sup>1</sup>H NMR and <sup>13</sup>C NMR of squaramideorganocatalysts and their precursors

<sup>1</sup>H NMR of **3**

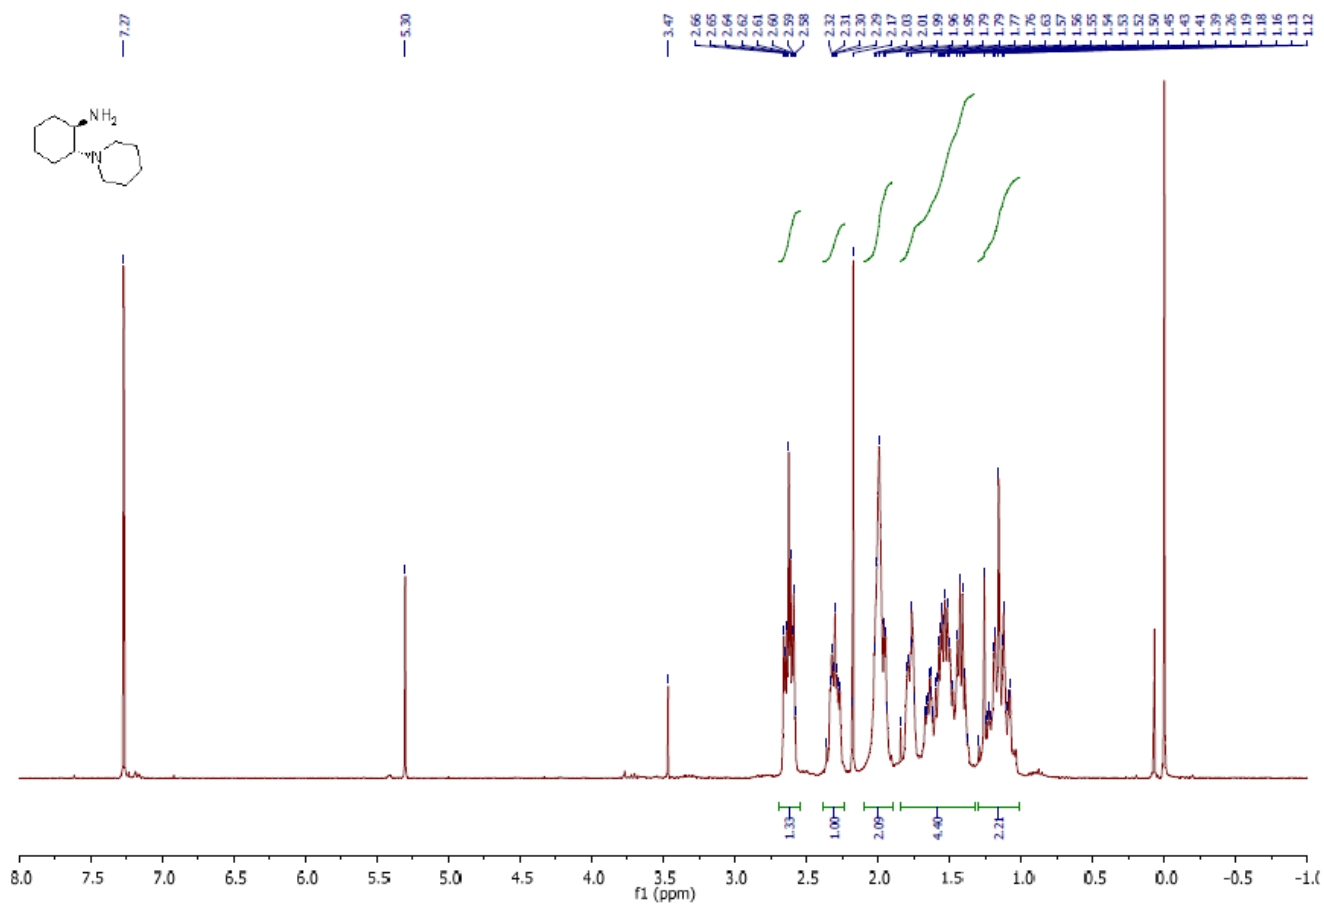

$^1\text{H}$  NMR of 3-[3,5-bis(trifluoromethyl)phenyl]amino-4-methoxycyclobut-3-ene-1,2-dione

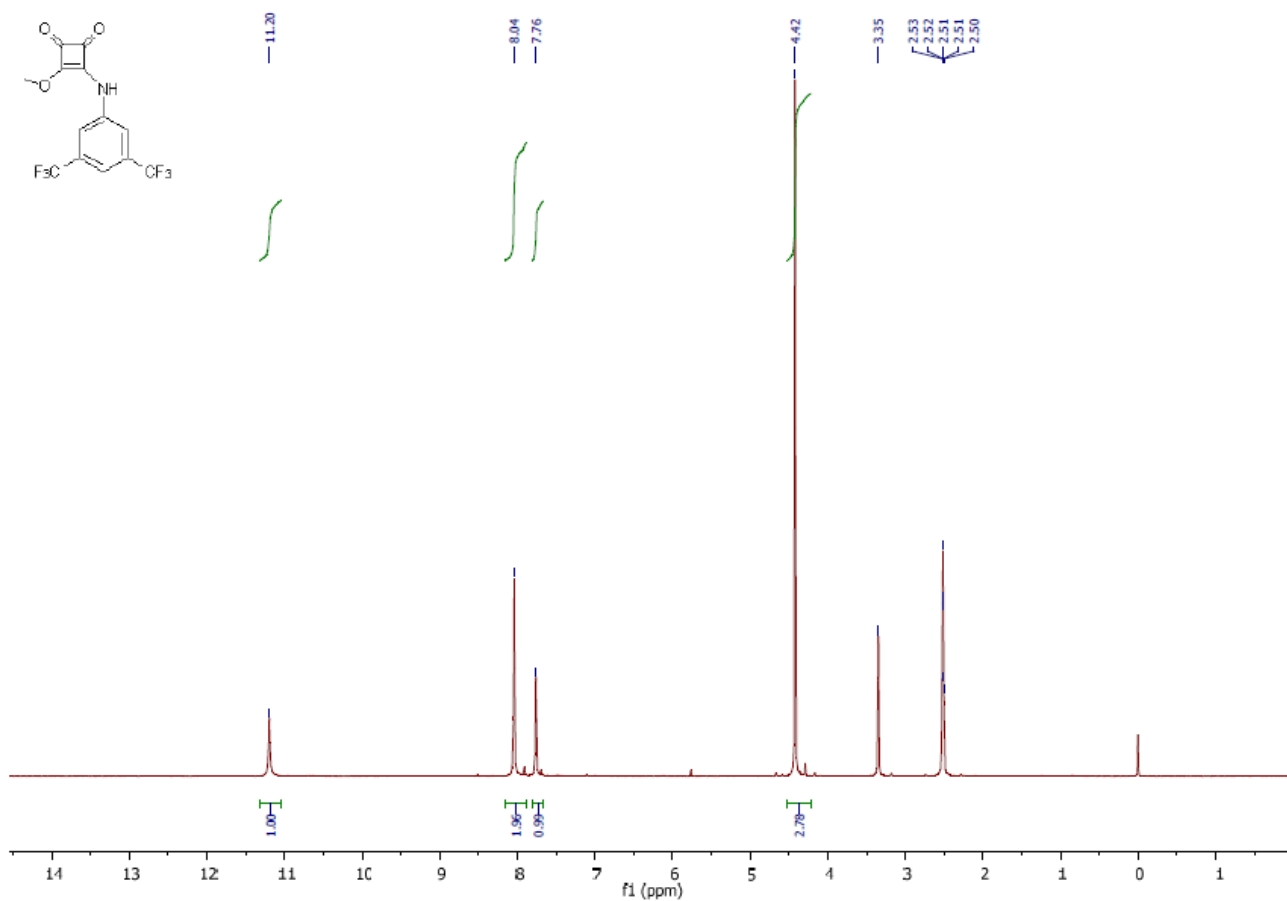

$^1\text{H}$  NMR of 3-[3,5-bis(trifluoromethyl)benzyl]amino-4-methoxycyclobut-3-ene-1,2-dione

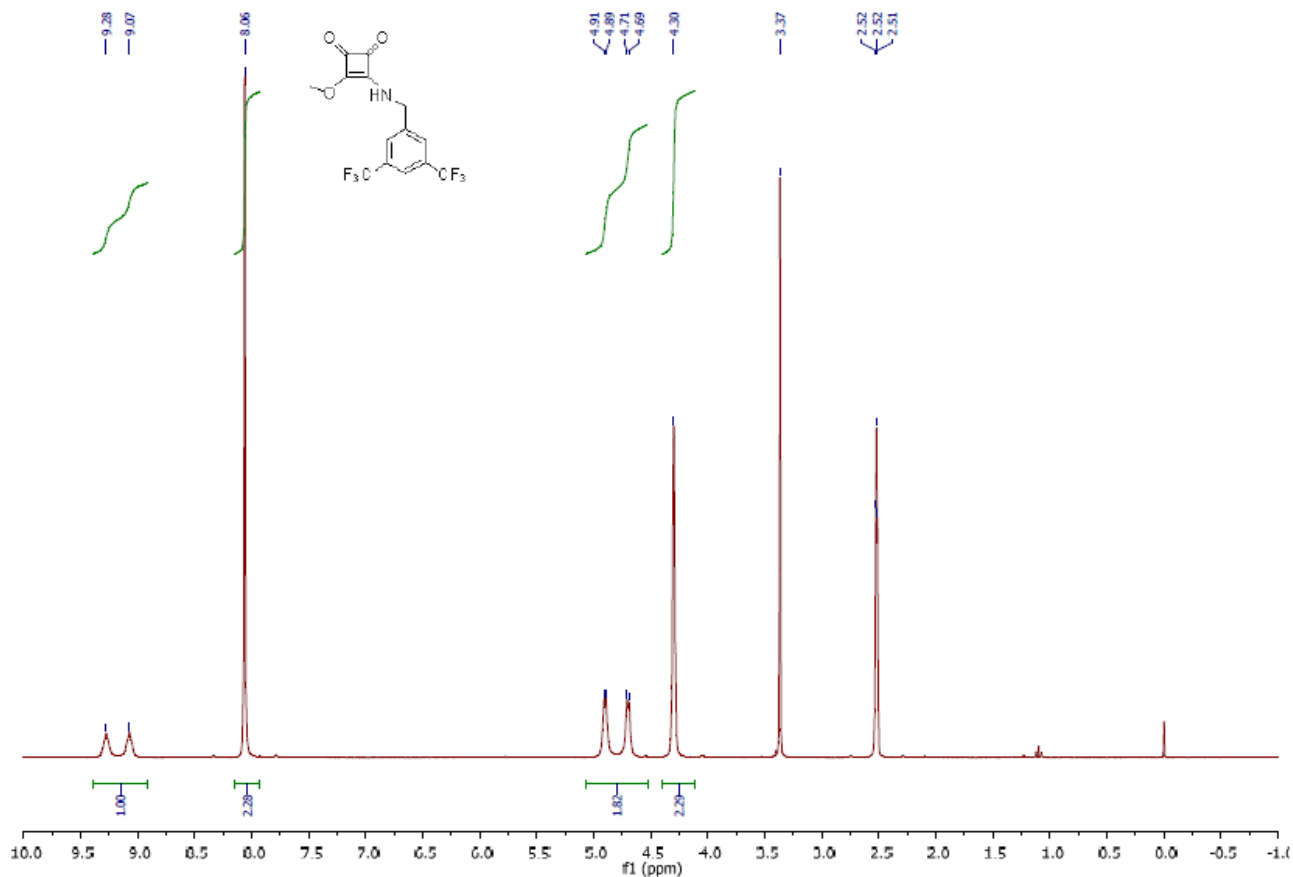

### <sup>1</sup>H NMR of C1

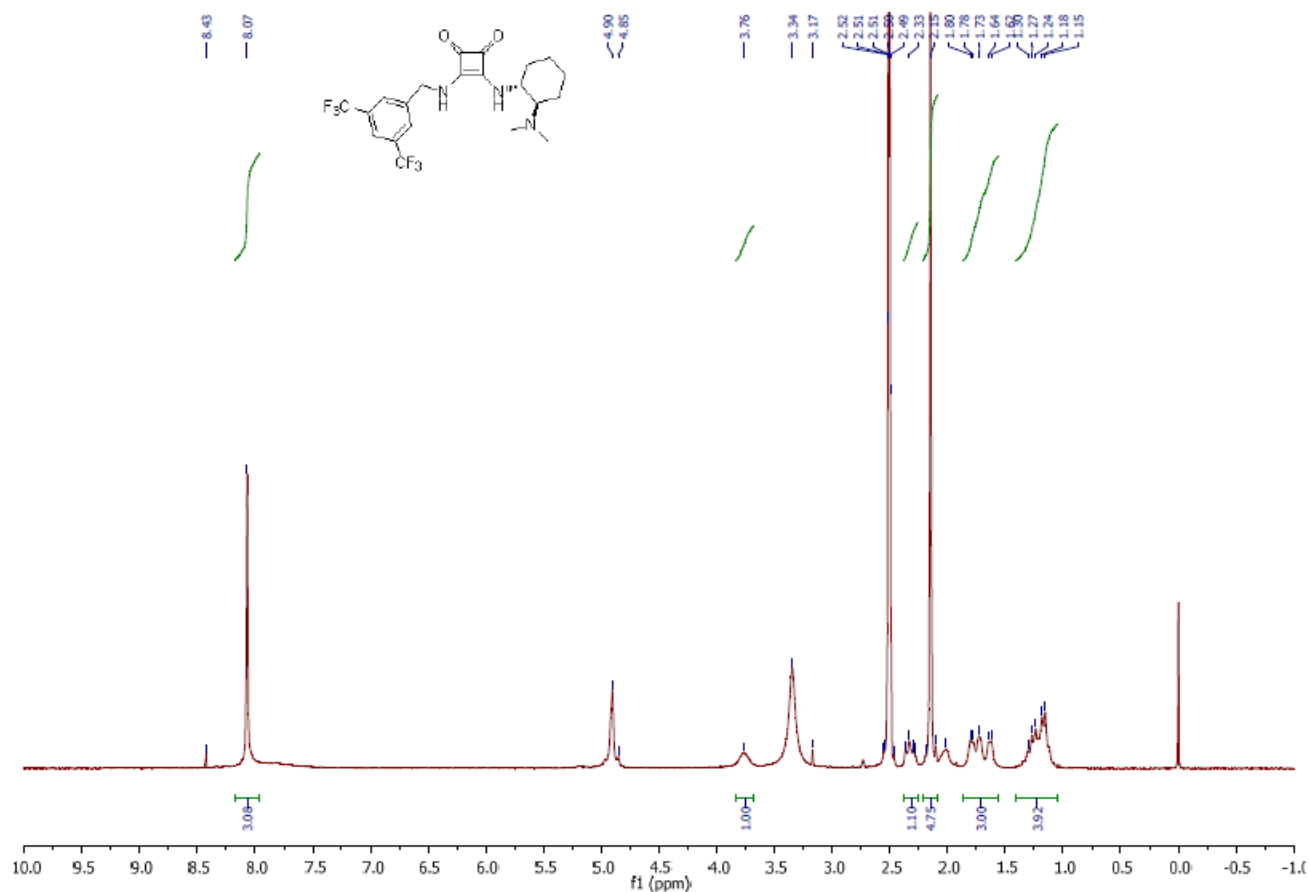

### <sup>13</sup>C NMR of C1

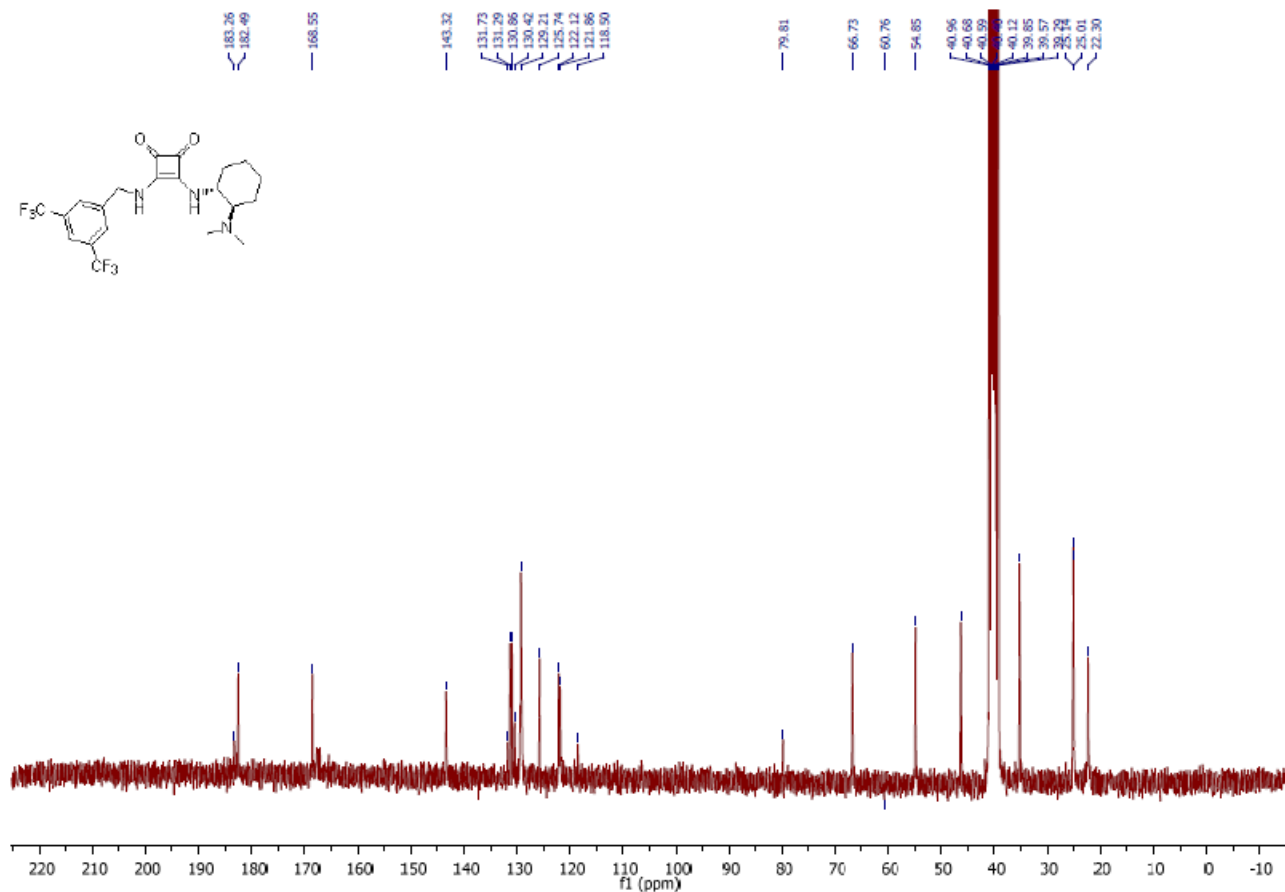

<sup>1</sup>H NMR of C2

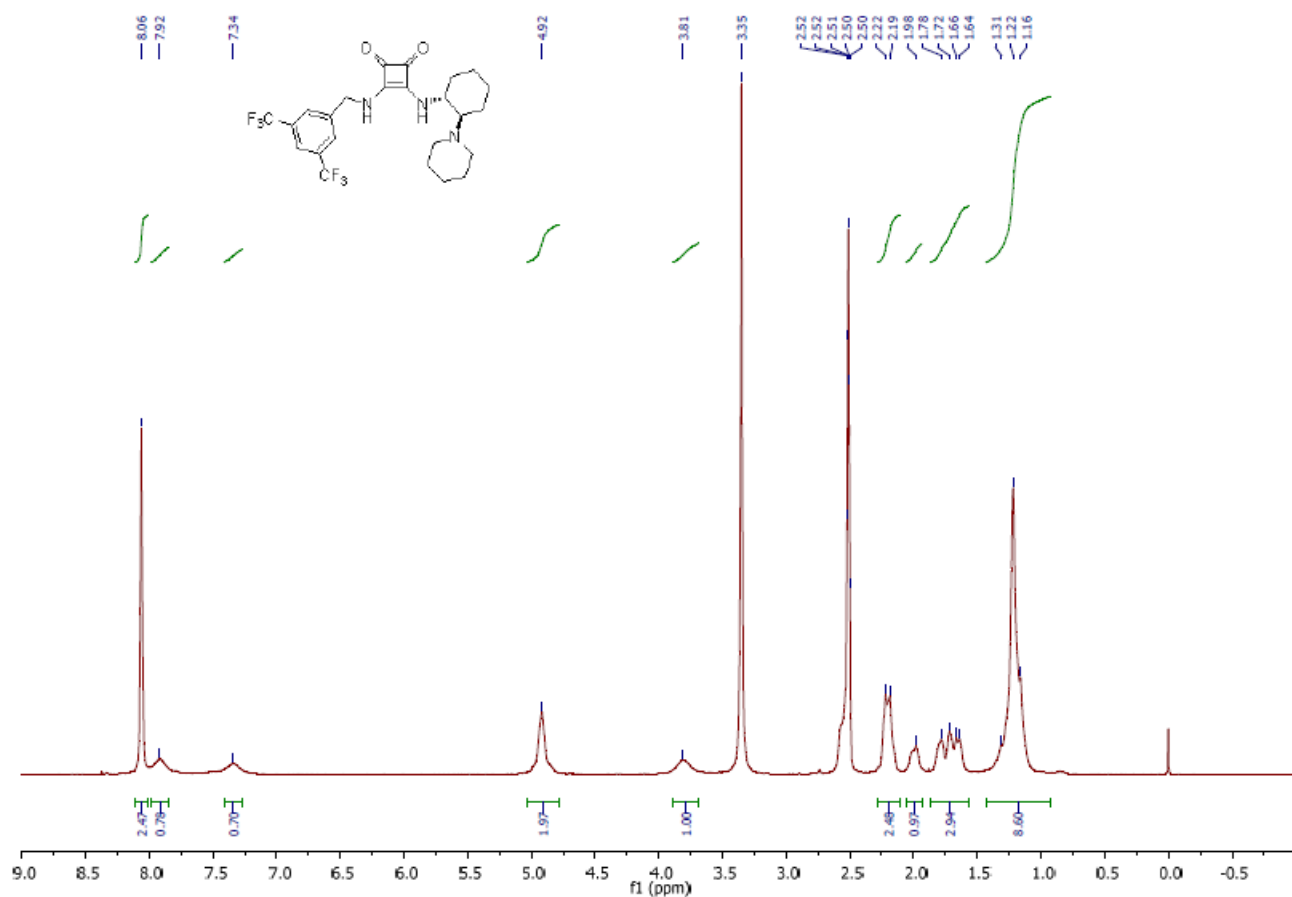

<sup>13</sup>C NMR of C2

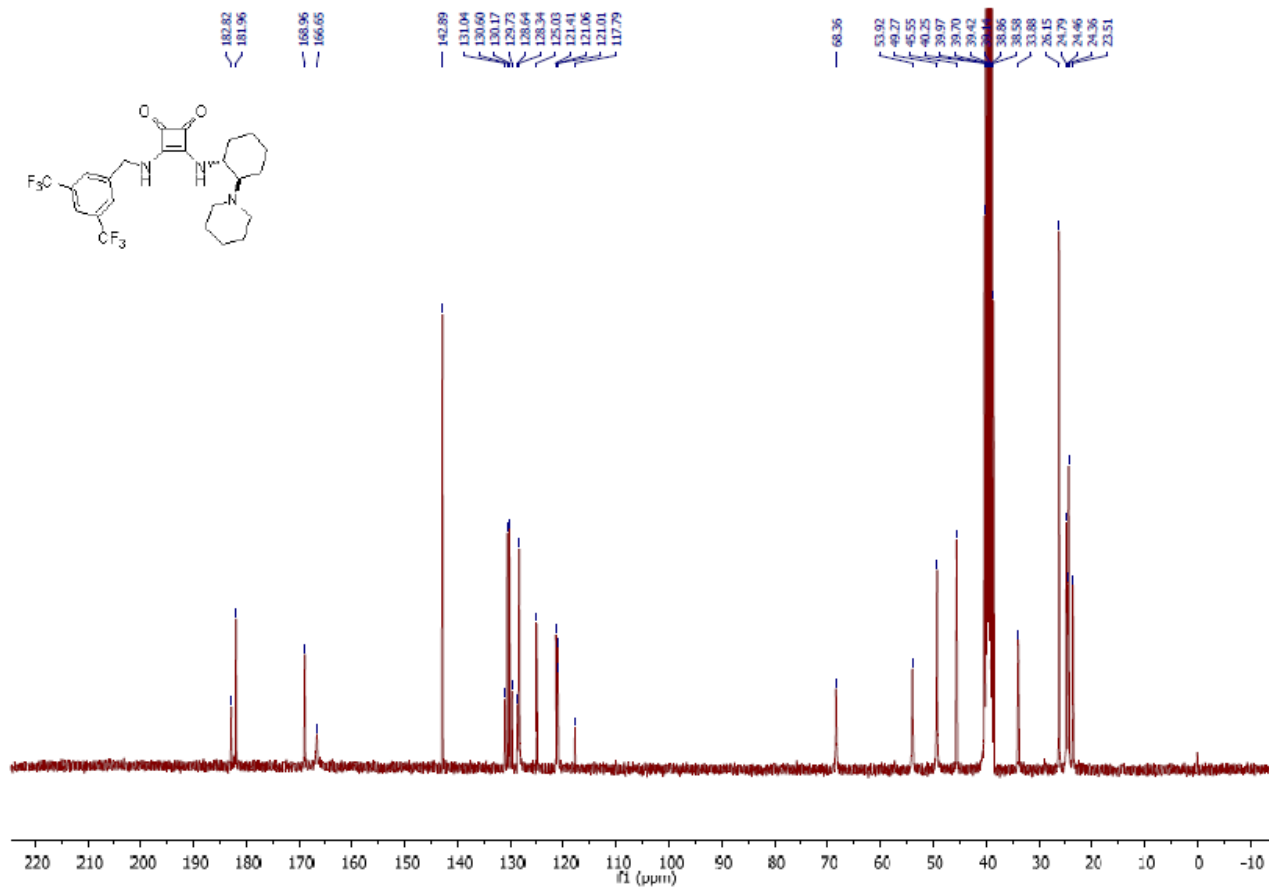

<sup>1</sup>H NMR of C3

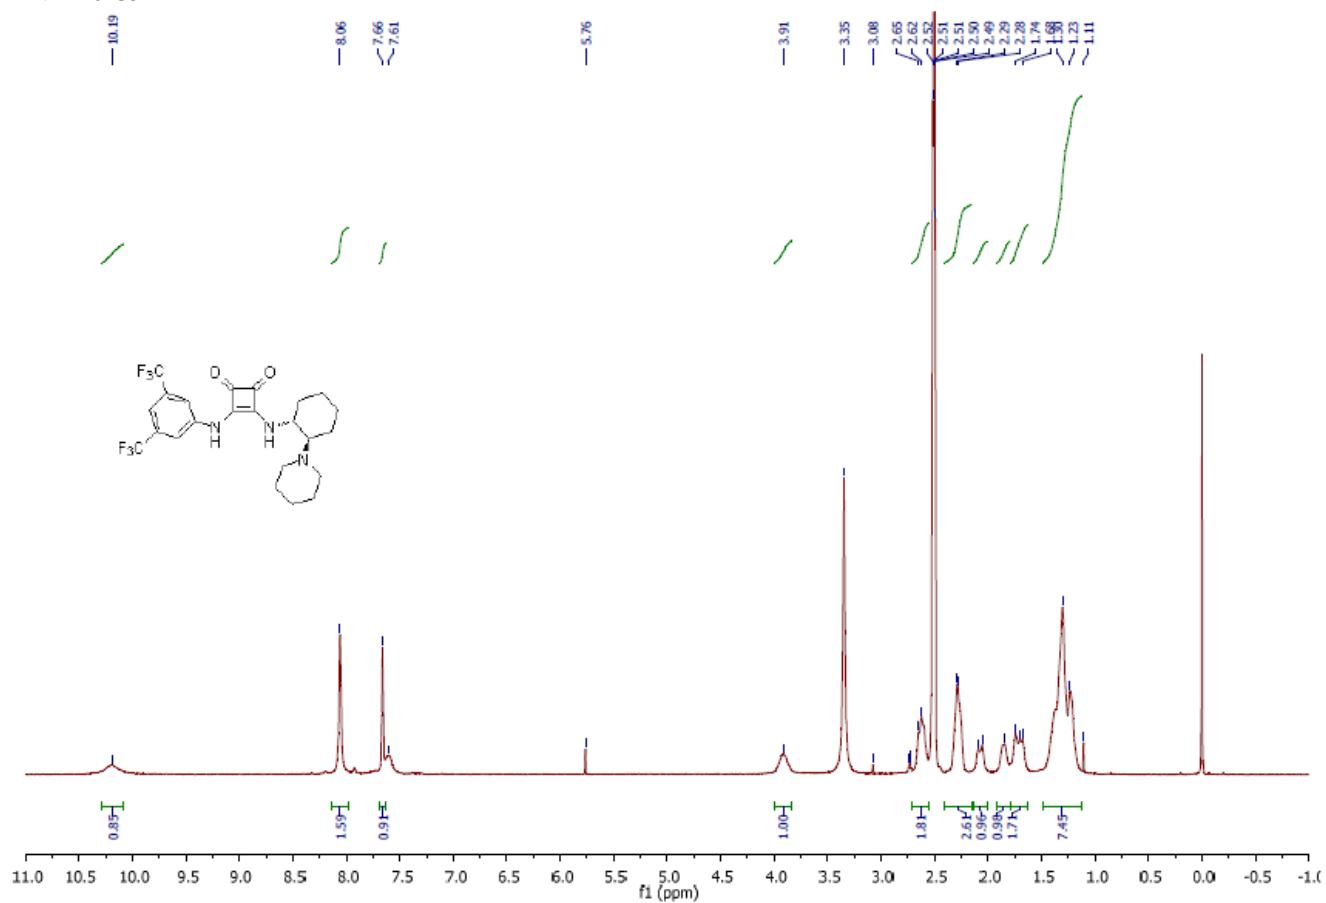

<sup>13</sup>C NMR of C3

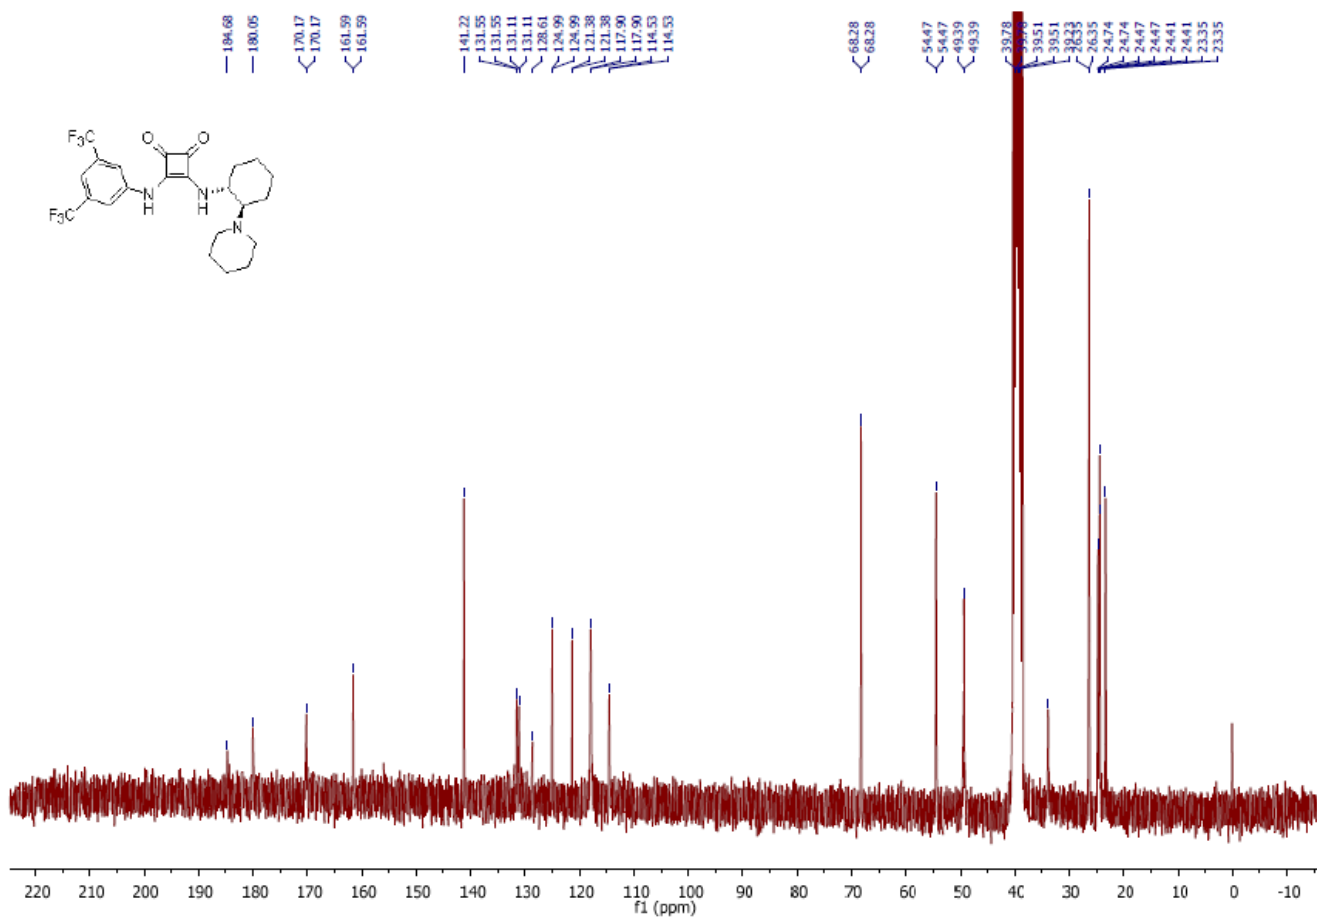

### <sup>1</sup>H NMR of c4

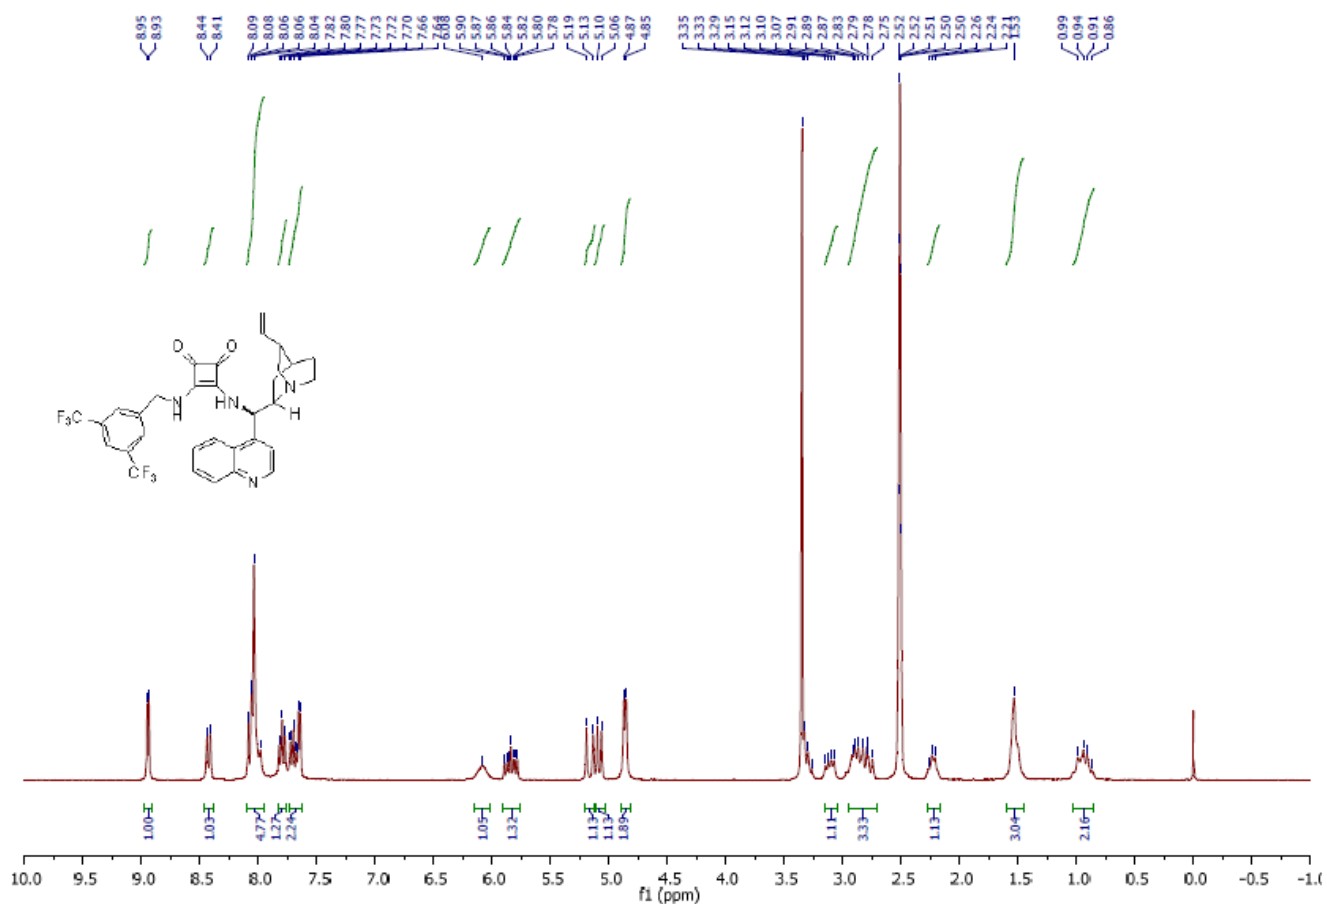

### <sup>13</sup>C NMR of c4

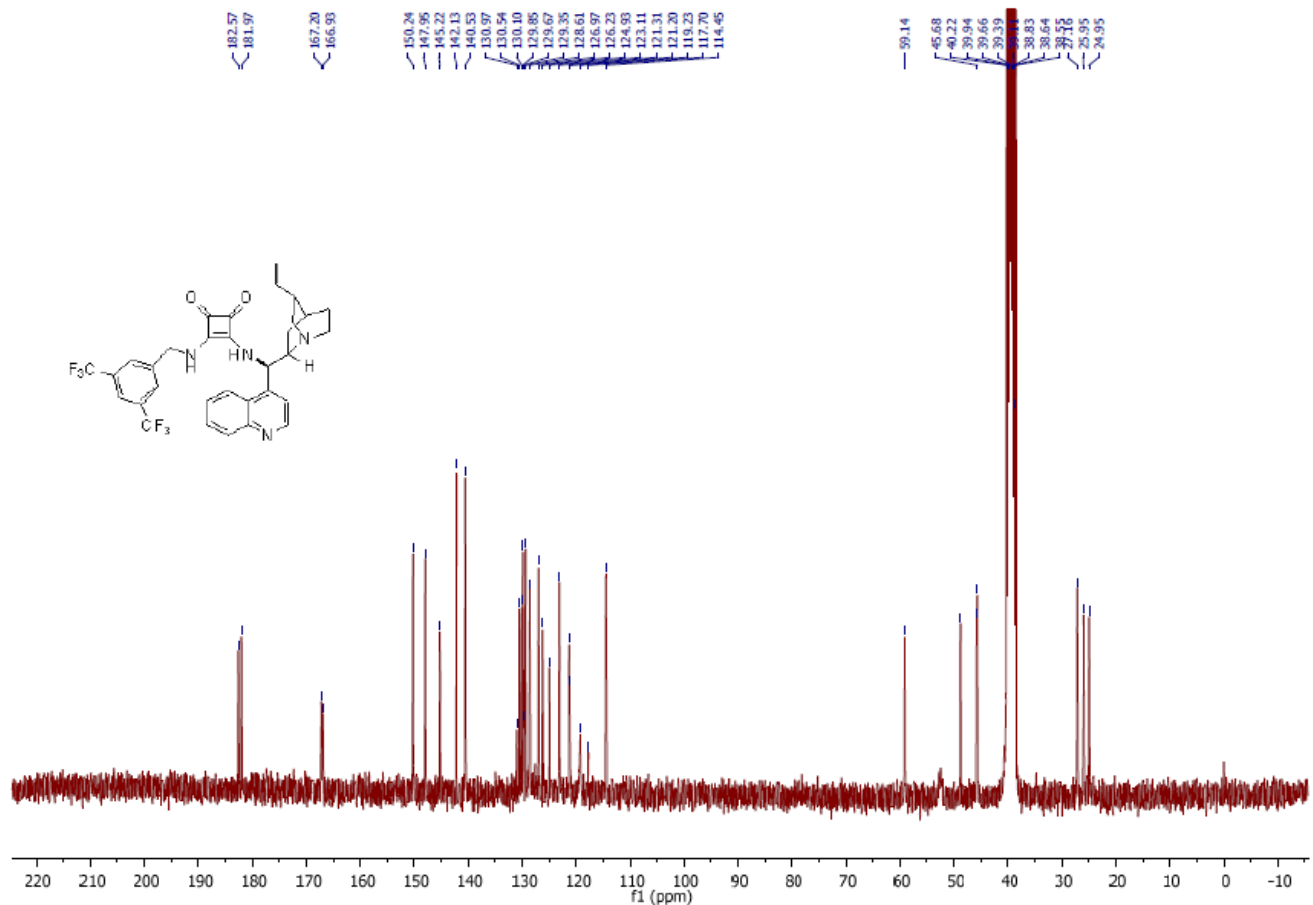

### <sup>1</sup>H NMR and <sup>13</sup>C NMR of Michael addition products

#### <sup>1</sup>H NMR of 6a

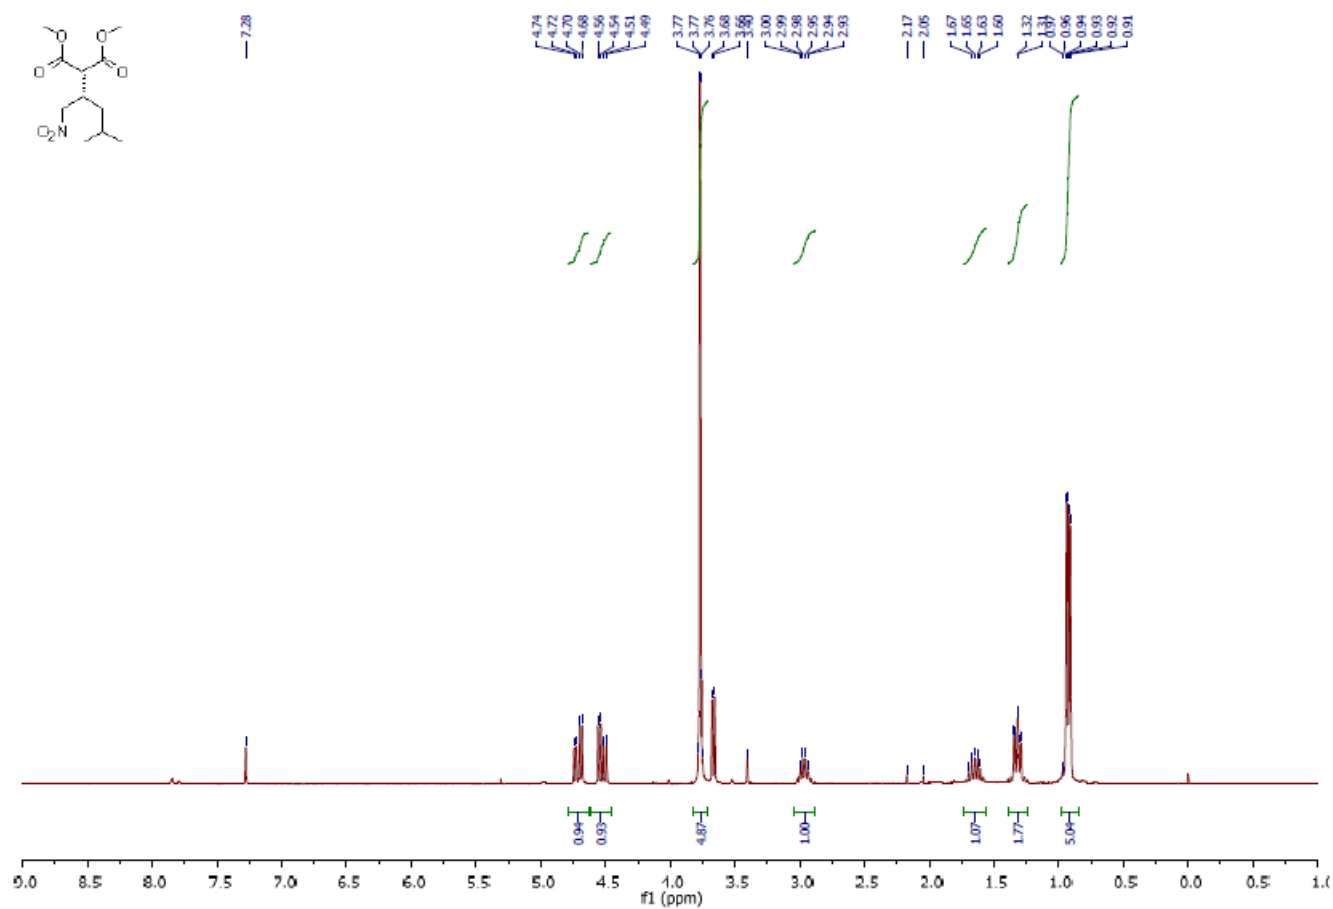

#### <sup>13</sup>C NMR of 6a

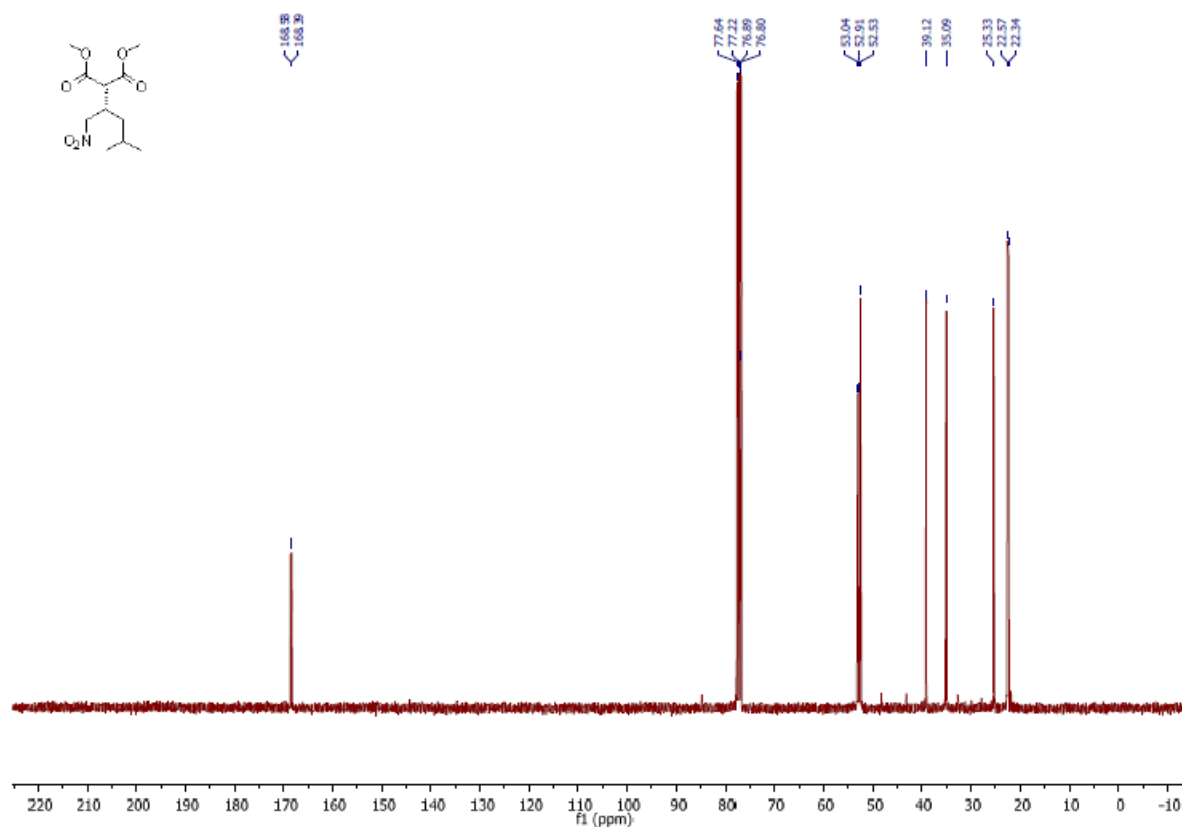

<sup>1</sup>H NMR of **6b**

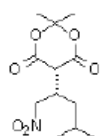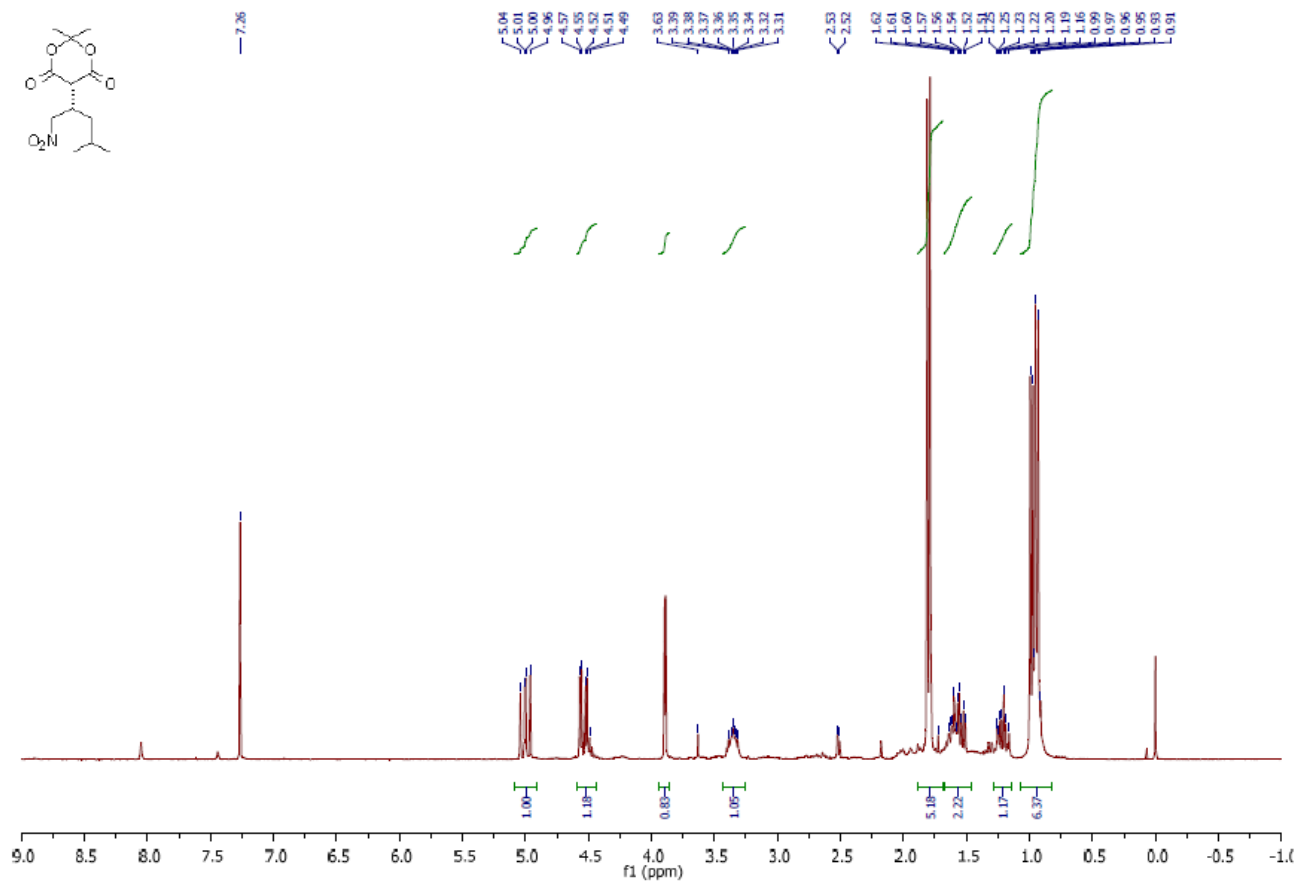

<sup>13</sup>C NMR of **6b**

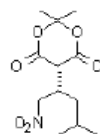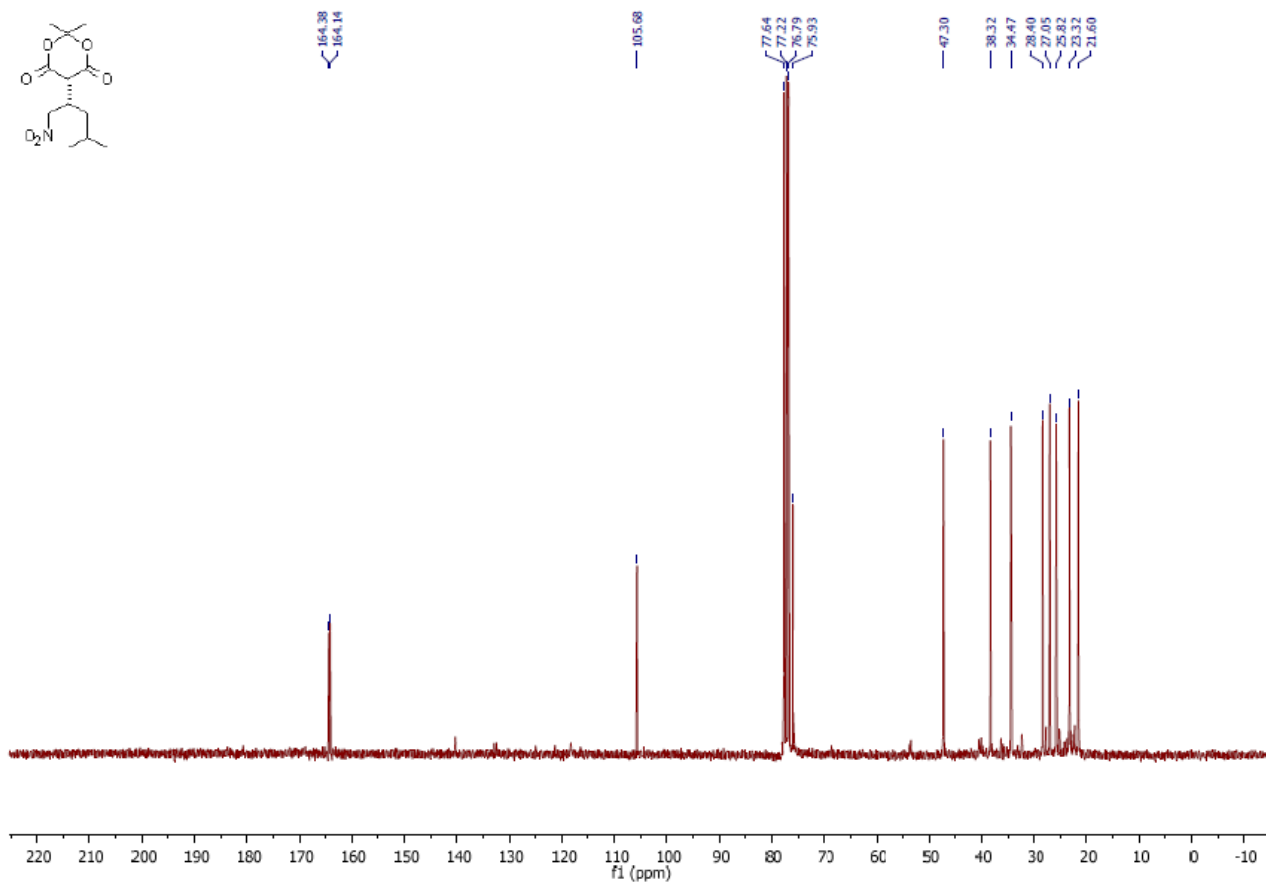



<sup>1</sup>H NMR of **6c**

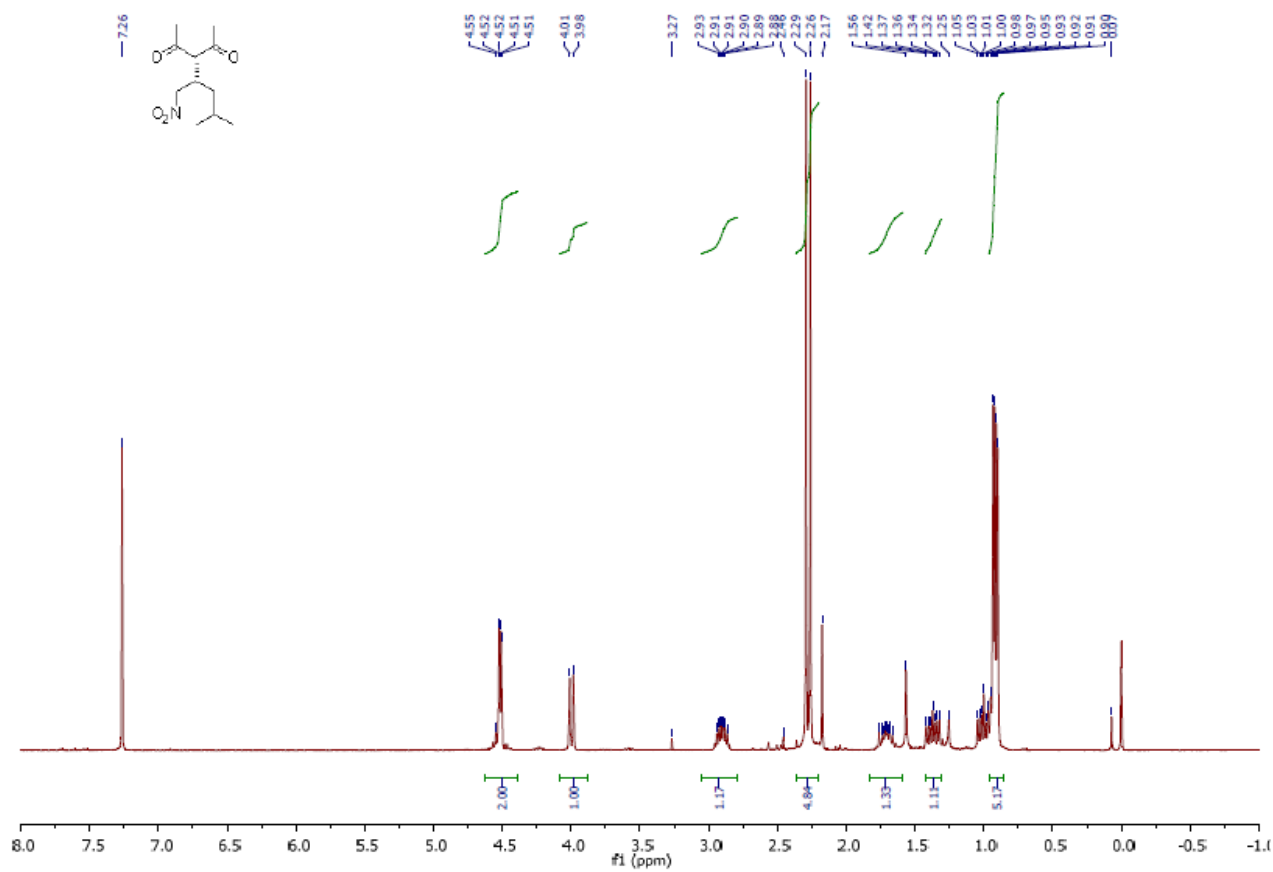

<sup>13</sup>C NMR of **6c**

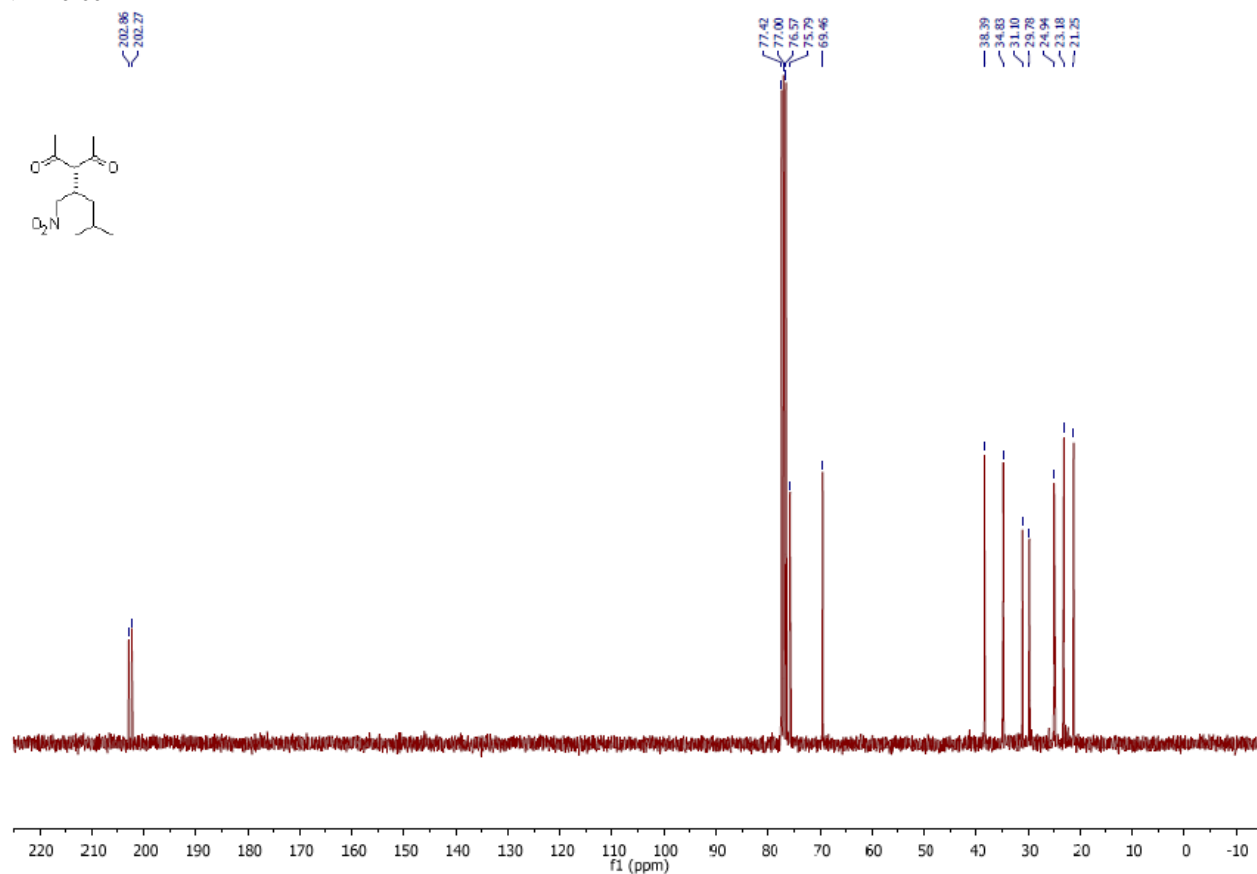

<sup>1</sup>H NMR of **6d**

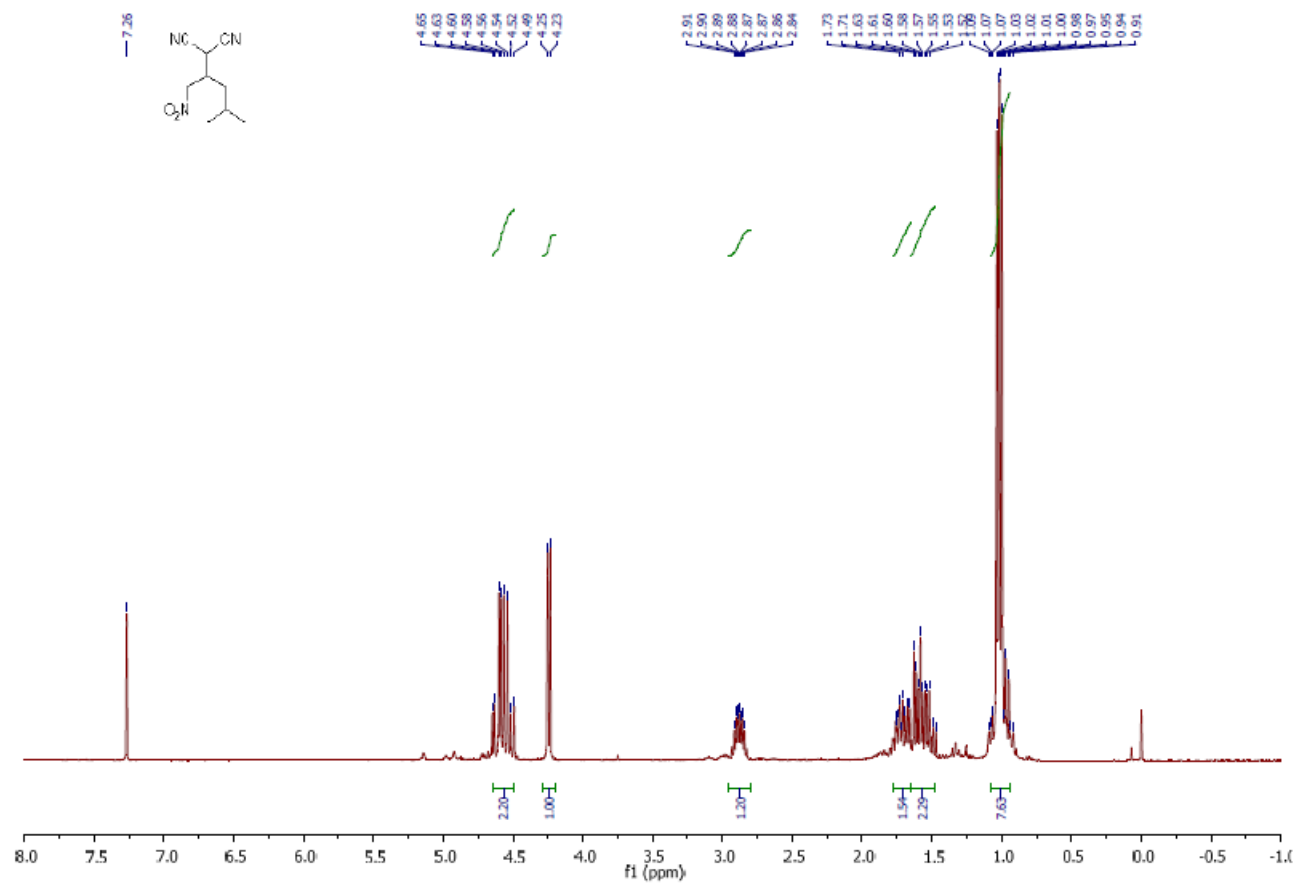

<sup>13</sup>C NMR of **6d**

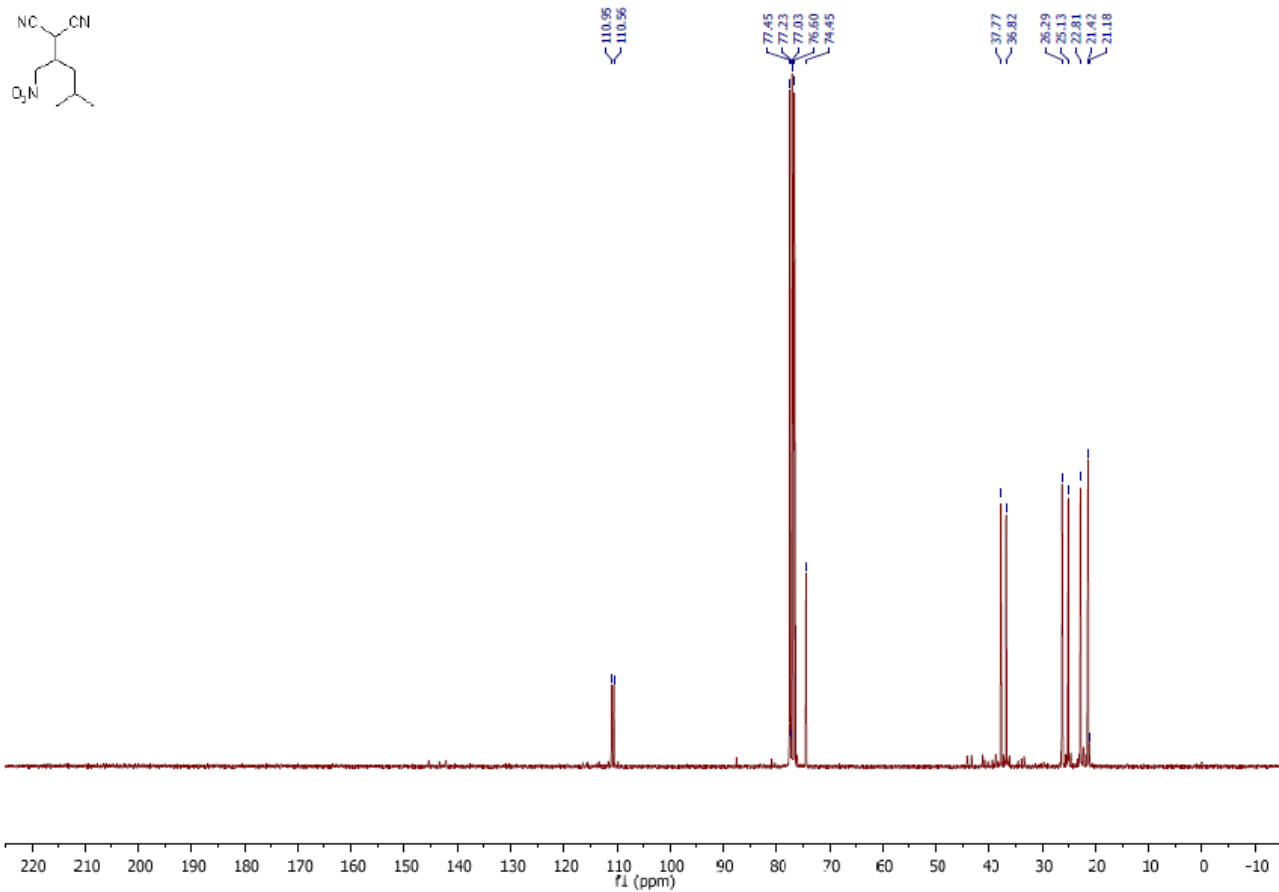

### $^1\text{H}$ NMR and $^{13}\text{C}$ NMR of pregabalin and its intermediates

$^1\text{H}$  NMR of 4

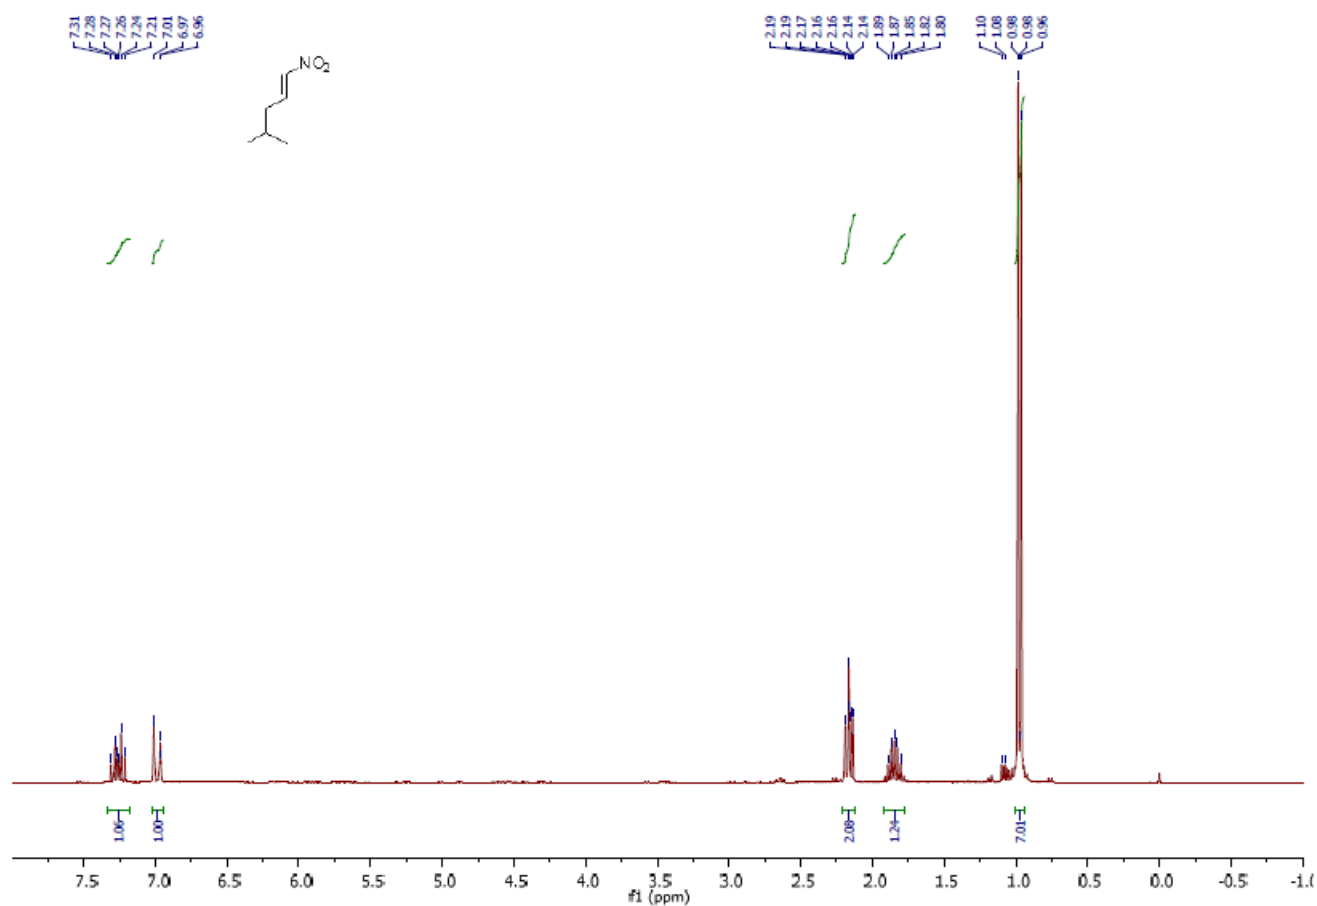

$^1\text{H}$  NMR of 7

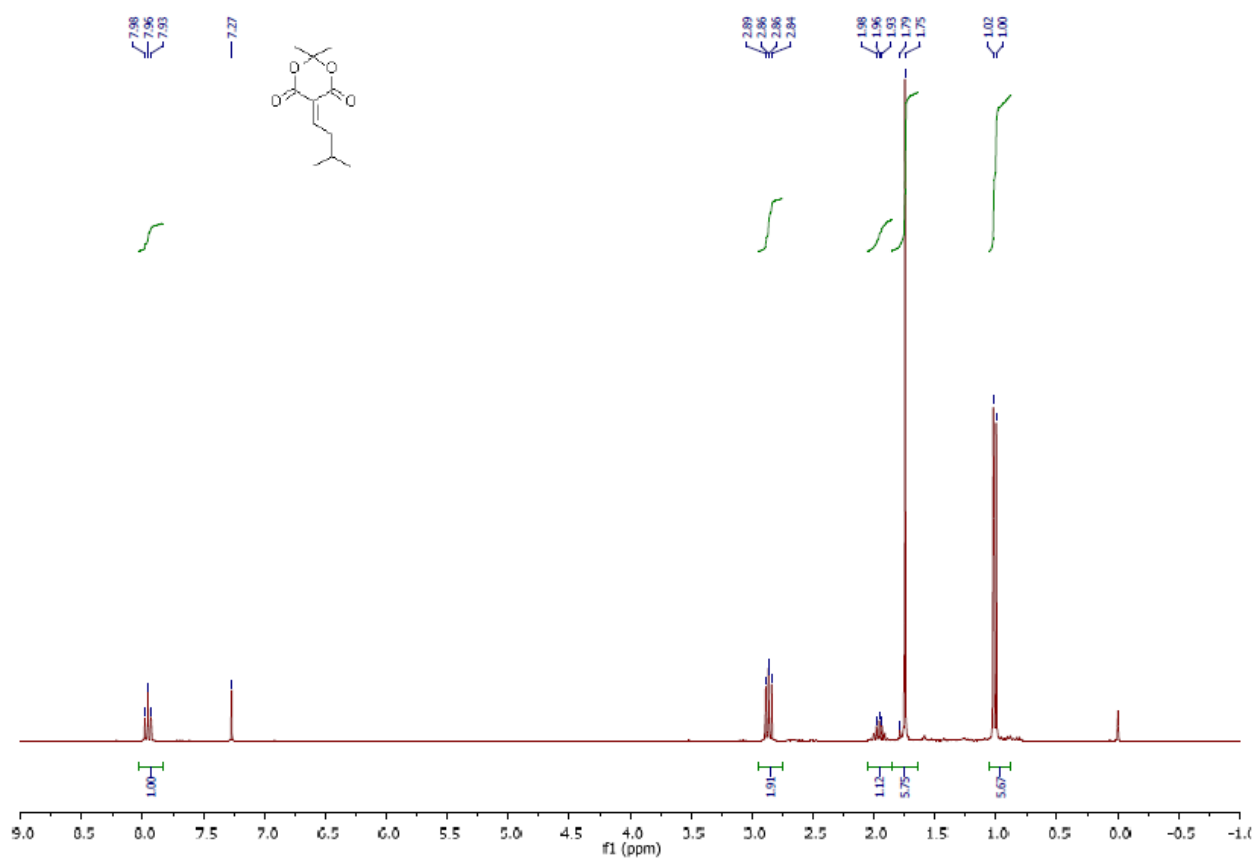

<sup>1</sup>H NMR of **8**

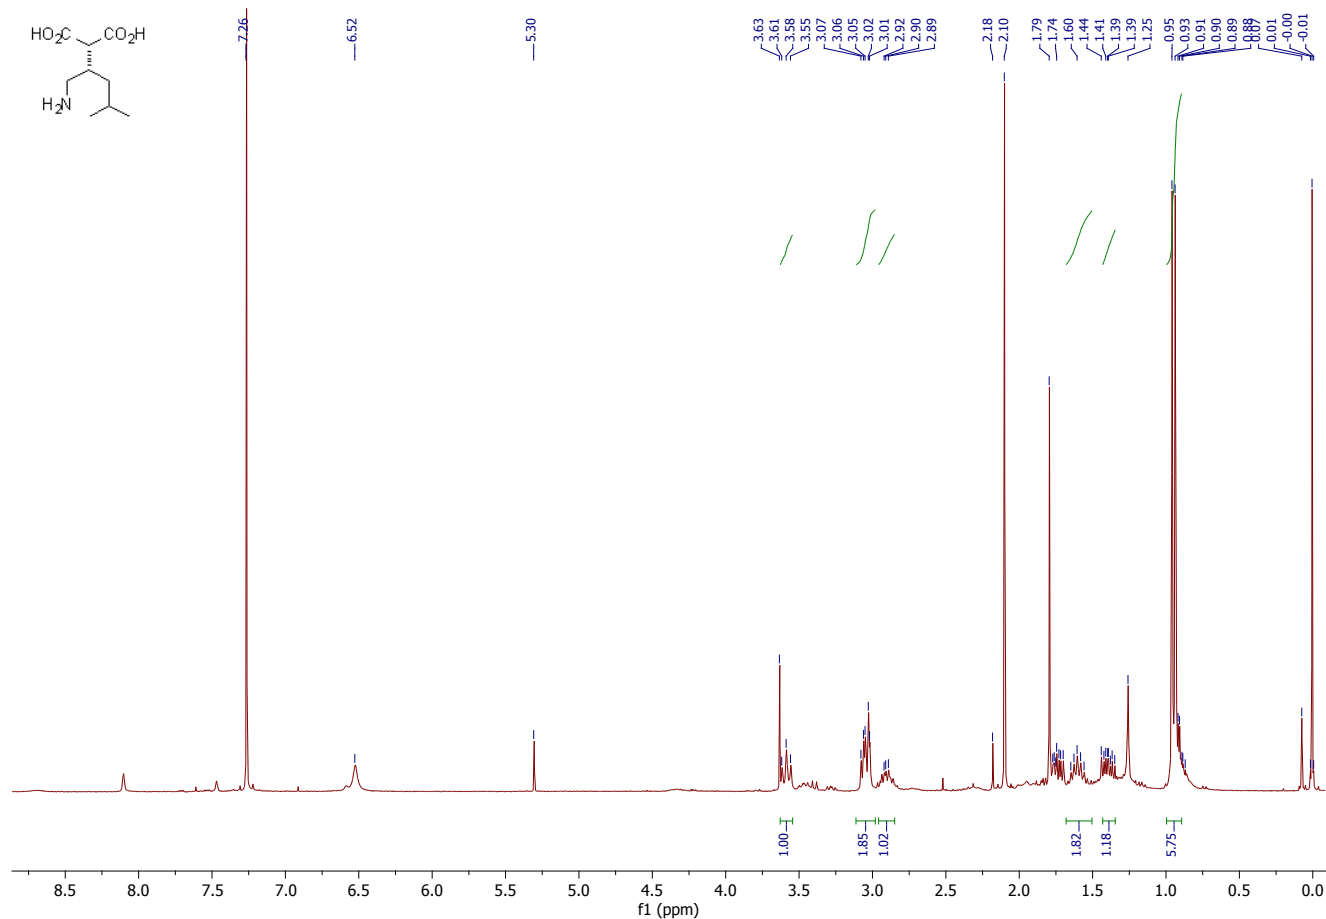

<sup>1</sup>H NMR of **9**

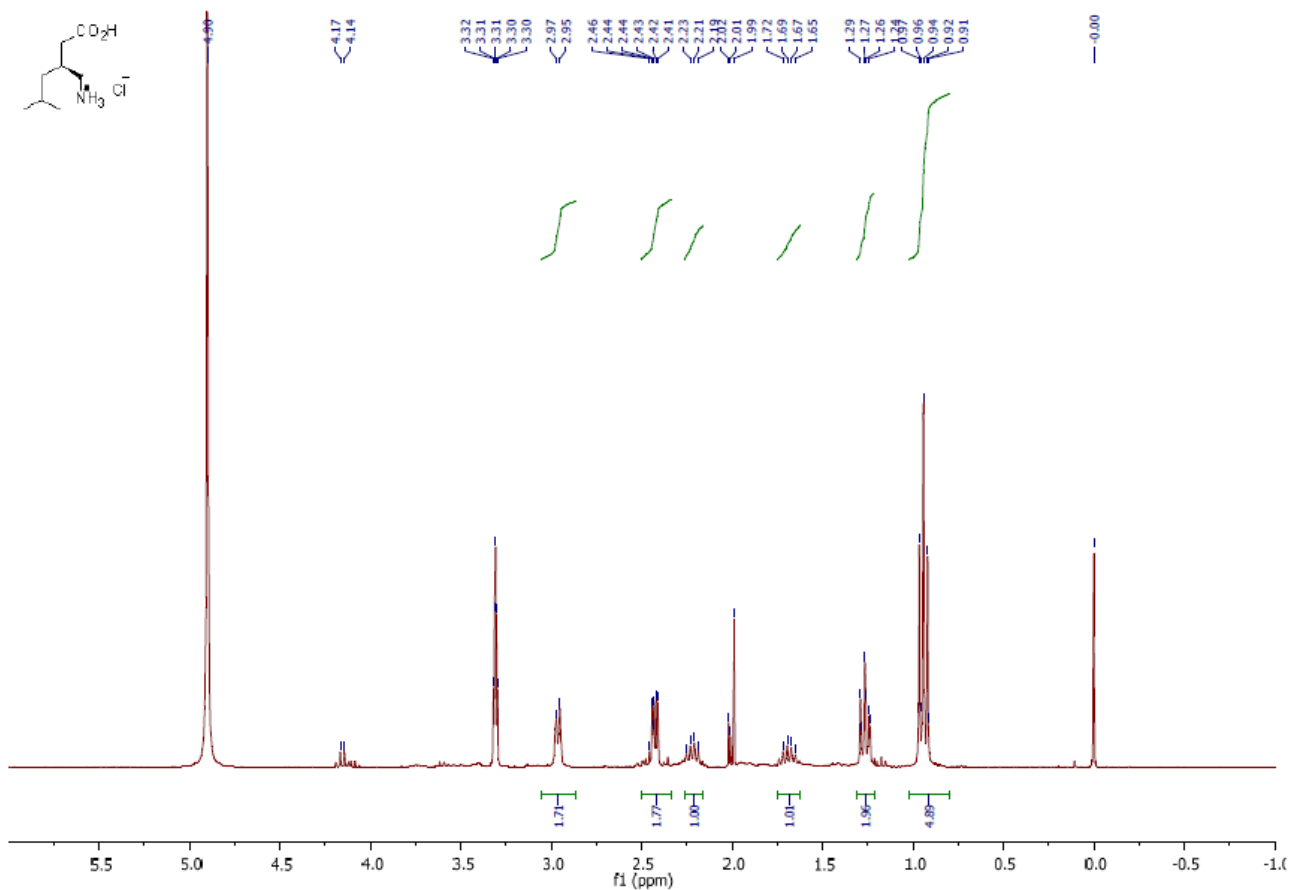

<sup>13</sup>C NMR of **9**

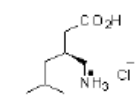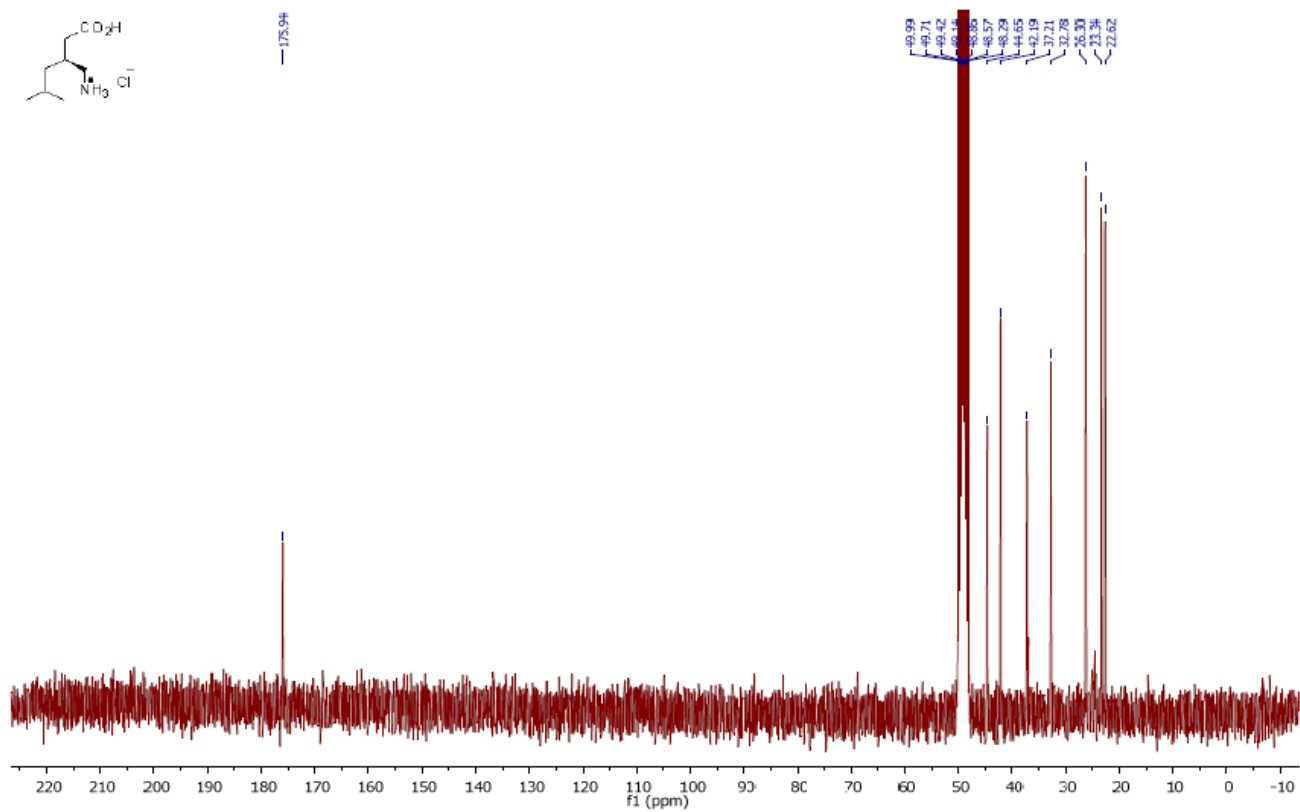

## HPLC chromatograms

*rac-6a*

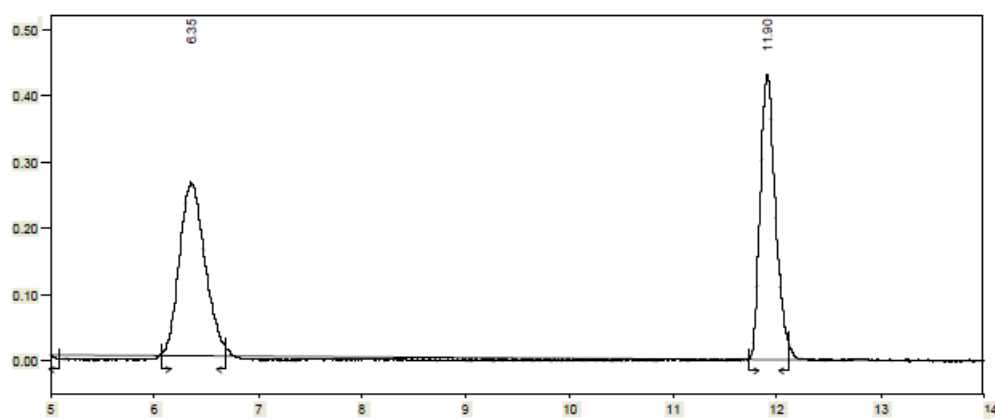

**6a**

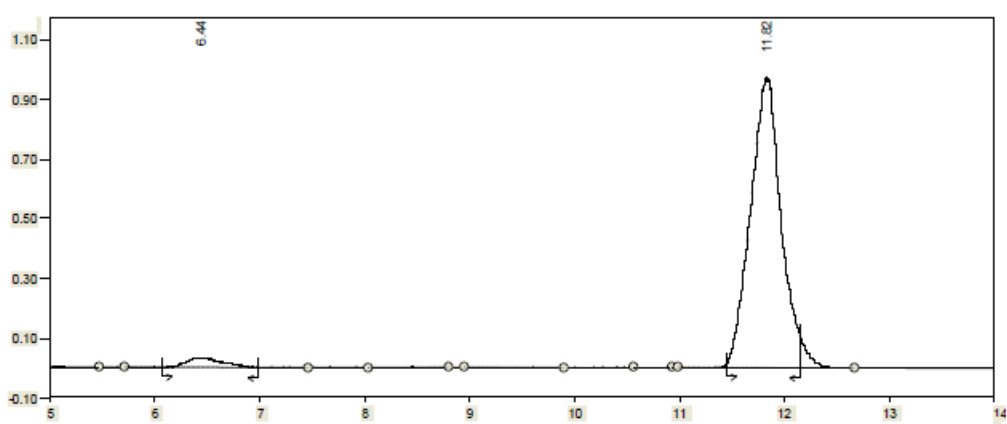

*rac-6c*

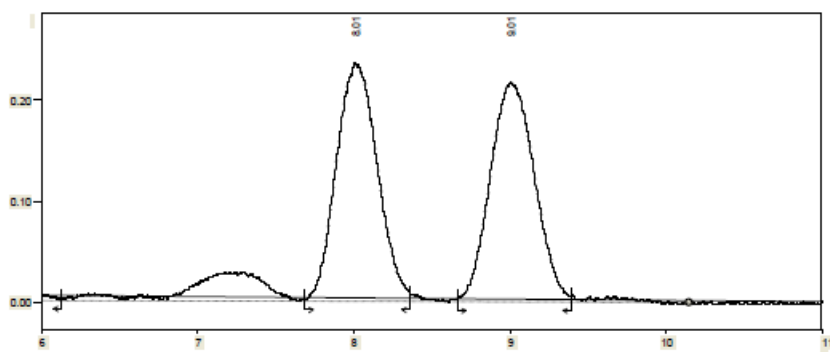

**6c**

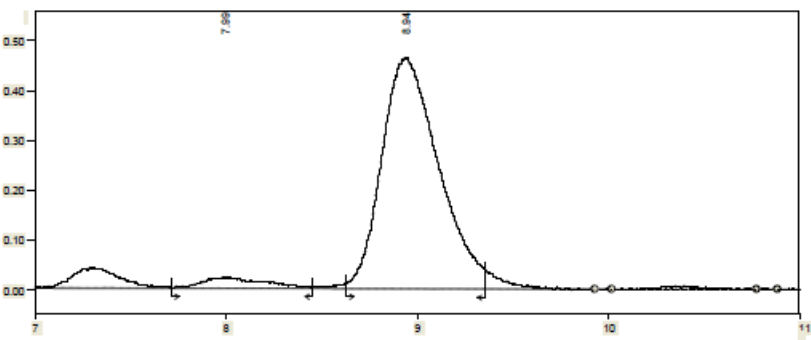

*rac-6d*

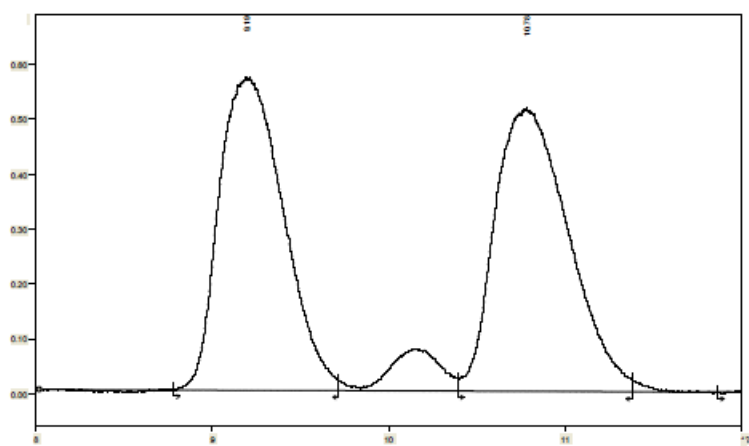

6d

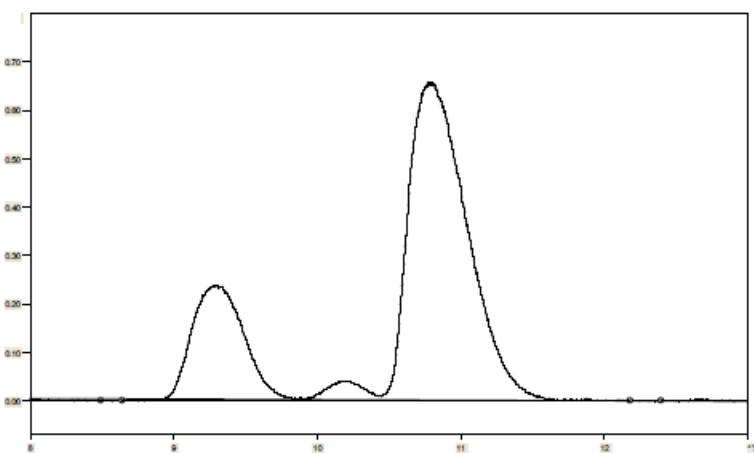

## DFT calculation

Transition state was first pre-optimized at the semiempirical AM1 followed by optimization at HF level (3-21G base) using Spartan 8 program package.<sup>1</sup> Finally transition state was refined at RI-DFT level<sup>2,3</sup> with BP86 functional<sup>4,5</sup> using def2-SVP basis set<sup>6</sup> as implemented in Turbomole package.<sup>7</sup> The transition state was characterized by frequency calculation at RI-DFT level<sup>8</sup> with BP86 functional using def2-SVP base. The transition state has just one imaginary vibration corresponding to C-C bond breaking (verified by visualization).

## The Cartesian coordinates and energy of TS

(DFT, BP86/def2-SVP)

E= -2778.153461792 au

Imaginary frequency: 1 (-204.6 cm<sup>-1</sup>)

|     |              |             |             |
|-----|--------------|-------------|-------------|
| C   | 4.58005090   | -4.34137595 | 1.67845503  |
| C   | 2.28986809   | -5.68239259 | 1.59291390  |
| N   | 0.00403457   | -4.51656166 | 1.09970500  |
| O   | -1.99806987  | -5.74893170 | 1.14824160  |
| O   | -0.02003816  | -2.12557815 | 0.54842590  |
| C   | 6.90100377   | -5.63676465 | 2.73598138  |
| C   | 7.16442153   | -5.46440541 | 5.66008949  |
| H   | 2.14666070   | -7.74472713 | 1.70956891  |
| H   | 4.43535017   | -2.30268987 | 2.08387414  |
| H   | 8.61787658   | -4.77316301 | 1.90105919  |
| H   | 6.99944814   | -3.42842144 | 6.17874194  |
| C   | 5.10368155   | -6.92411372 | 7.09129805  |
| C   | 9.81215644   | -6.36414312 | 6.45354790  |
| H   | 6.91617254   | -7.65691839 | 2.15811950  |
| H   | 11.32362807  | -5.25257274 | 5.51731760  |
| H   | 10.08127769  | -6.19284430 | 8.52531749  |
| H   | 10.10086279  | -8.38097729 | 5.94712135  |
| H3  | 1.7924721    | -6.24845479 | 6.61862951  |
| H5  | 3.5750740    | -6.73322797 | 9.16369067  |
| H5  | 1.8288528    | -8.97206305 | 6.63429520  |
| C-1 | 2.5263042    | 3.91283798  | 1.95371132  |
| C-3 | 7.2808854    | 3.08197368  | 1.28529660  |
| C-2 | 0.3936271    | 6.60395811  | 2.02736031  |
| C-4 | 7.5594722    | 5.73999803  | 1.48605793  |
| N0  | 9.8558251    | 2.69663514  | 2.13652780  |
| N-4 | 5.5045582    | 0.73442676  | 0.71330278  |
| O-6 | 7.9990021    | 6.77759256  | 1.24118789  |
| O-0 | 9.3513353    | 8.63613863  | 2.29957331  |
| H   | 0.97045277   | 0.74673469  | 1.87571030  |
| H-3 | 1.3963673    | -0.65661988 | 0.66125856  |
| C-6 | 9.9592787    | -0.07674207 | 0.04822955  |
| C   | -11.79683867 | -1.96921420 | -1.31903687 |
| C   | -7.32206432  | -2.68317446 | -0.44620355 |
| C   | -9.07984161  | 1.58205059  | -0.12176208 |
| C   | -11.45276468 | 0.61279741  | -0.80694695 |
| C   | -9.71180496  | -3.60163738 | -1.13201321 |
| C   | 3.32742465   | 3.86039192  | 3.04154937  |
| C   | 6.86821155   | 7.03610147  | 2.47403576  |
| C5  | 4.3706874    | 5.91249784  | 6.89749163  |
| C6  | 4.7640307    | 7.99955843  | 5.18615234  |
| C2  | 9.9248517    | 4.85408716  | 5.77325254  |
| C4  | 4.1764846    | 5.98190853  | 1.30009395  |

<sup>1</sup>Spartan '08, Wavefunction, Inc., Irvine, CA.

<sup>2</sup>K. Eichkorn, O. Treutler, H. Oehm, M. Haeser, R. Ahlrichs *Chem. Phys. Lett.* **1995**, *242*, 652-660.

<sup>3</sup>K. Eichkorn, F. Weigend, O. Treutler, R. Ahlrichs *Theo. Chem. Acc.* **1997**, *97*, 119-124.

<sup>4</sup>O. Treutler, R. Ahlrichs *J. Chem. Phys.* **1995**, *102*, 346-354.

<sup>5</sup>M. v. Arnim, R. Ahlrichs *J. Comp. Chem.* **1998**, *19*, 1746-1757.

<sup>6</sup>F. Weigend *Phys. Chem. Chem. Phys.* **2006**, *8*, 1057-1065.

<sup>7</sup>TURBOMOLE V6.4, TURBOMOLE GmbH, Karlsruhe, 2012.

<sup>8</sup>Deglmann, P.; May, K.; Furche, F.; Ahlrichs, R. *Chem. Phys. Lett.* **2004**, *384*, 103-107.



|                |             |             |
|----------------|-------------|-------------|
| H4.74714224    | 2.31133461  | 3.05919937  |
| H2.23743281    | 3.27778373  | 6.93058419  |
| H5.08216194    | 6.64463269  | 8.82989777  |
| H6.86440559    | 4.37949812  | 7.09422054  |
| H8.29827236    | 8.73899608  | 5.91498895  |
| H8.33241454    | 5.52504305  | 2.47491237  |
| H7.60874286    | 8.61014734  | 1.31131730  |
| H -5.70313638  | -3.97920128 | -0.24756346 |
| H -13.66840515 | -2.70356992 | -1.82702199 |
| H -8.85534157  | 3.61248278  | 0.29499294  |
| H 2.97948625   | 7.50439454  | 1.15552798  |
| H 5.13807318   | 9.61876475  | 5.16138684  |
| C -10.01695827 | -6.37748626 | -1.76433133 |
| C -13.65850273 | 2.41651657  | -1.09555391 |
| F -13.57896577 | 4.31088266  | 0.61858135  |
| F -13.67164713 | 3.50524595  | -3.42233847 |
| F -15.90989101 | 1.21858505  | -0.82098968 |
| F -12.44653464 | -7.15318175 | -1.49509254 |
| F -8.56287897  | -7.86290325 | -0.27681734 |
| F-9.34435211   | -6.85765418 | -4.19607607 |
| N4.90980869    | 4.95623661  | -1.38774471 |
| C2.57851444    | 4.75665988  | -3.05154488 |
| C6.94206803    | 6.29142218  | -2.89616280 |
| C1.63123327    | 7.33207463  | -3.95172094 |
| C3.69758135    | 8.78610798  | -5.37986893 |
| H8.69113174    | 6.31782779  | -1.76365521 |
| H7.30898412    | 5.03350339  | -4.53161798 |
| H3.03898073    | 10.71410209 | -5.86836862 |
| H4.10856019    | 7.81751447  | -7.20105677 |
| H3.16714298    | 3.56950667  | -4.67740798 |
| H1.14377096    | 3.69315340  | -1.98720378 |
| H-0.03825329   | 7.00355292  | -5.17585619 |
| H0.92997934    | 8.44954679  | -2.31828200 |
| H5.63126590    | 3.06812440  | -1.15266486 |
| H1.52740316    | 6.35667232  | 5.74045680  |
| C6.12843399    | 8.91426397  | -3.79558639 |
| H5.84518903    | 10.18432047 | -2.14734715 |
| H7.70719029    | 9.73862850  | -4.90293263 |
| C 10.26529685  | -4.55255593 | -3.94760221 |
| C5.92805337    | -5.85303209 | -3.20864872 |
| C7.52498421    | -1.57779858 | -1.80347921 |
| C5.48371834    | -3.34467604 | -2.13150804 |
| O7.32356359    | 0.61311981  | -0.92994934 |
| O4.32690949    | -7.43916596 | -3.63923639 |
| O9.92614471    | -2.41428866 | -2.22985629 |
| O8.48067879    | -6.50777818 | -3.46812312 |
| C 12.86831407  | -5.62418938 | -3.36310387 |
| C 10.00326974  | -3.59438219 | -6.66888148 |
| H 13.26273149  | -7.24546636 | -4.62229226 |
| H 14.33462109  | -4.16018372 | -3.64234379 |
| H 12.92863016  | -6.28431056 | -1.38063768 |
| H 10.30104147  | -5.17653337 | -8.00402823 |
| H 11.41314874  | -2.09801705 | -7.05644907 |
| H 8.08702409   | -2.81717439 | -6.99962191 |
| H3.58483367    | -2.54077843 | -2.38363337 |
